# Supplementary material for: First Report of Phaeoacremonium iranianum Causing Olive Twig and Branch Dieback
Source: MDPI journal article supplement (doi:10.3390/plants11243578), 2022-12-19
Supplement: s1 [file s1]

**Table S1.** PCR amplification program set according to Alves et al. (2006) [30].

| Hot Start<br>95 °C | Start<br>Cycle | Denaturation<br>94 °C | Annealing<br>55 °C | Elongation<br>72 °C           | End Cycle | Elongation<br>72 °C |
|--------------------|----------------|-----------------------|--------------------|-------------------------------|-----------|---------------------|
| 5 minutes          | 30 times       | 30 seconds            | 45 seconds         | 1 minute<br>and 30<br>seconds |           | 10 minutes          |
